# Herpes-Virus Infection in Patients with Langerhans Cell Histiocytosis: A Case-Controlled Sero-Epidemiological Study, and In Situ Analysis

Eric Jeziorski<sup>1,9</sup>, Brigitte Senechal<sup>1,9</sup>, Thierry Jo Molina<sup>1,2</sup>, Francis Devez<sup>2</sup>, Marianne Leruez-Ville<sup>3</sup>, Patrice Morand<sup>4</sup>, Christophe Glorion<sup>3</sup>, Ludovic Mansuy<sup>5</sup>, Joel Gaudelus<sup>6</sup>, Marianne Debre<sup>3</sup>, Francis Jaubert<sup>1,3</sup>, Jean-Marie Seigneurin<sup>4</sup>, Caroline Thomas<sup>7</sup>, Irene Joab<sup>8</sup>, Jean Donadieu<sup>9</sup>, Frederic Geissmann<sup>1,3\*</sup>

**1** Laboratory of biology of the mononuclear phagocyte system, INSERM U838, University Paris-Descartes, Paris, France, **2** Hôpital de l'Hotel Dieu, Pathology department, AP-HP, Paris, France, **3** Hôpital Necker-Enfants Malades, AP-HP, Paris, France, **4** Centre Hospitalo-Universitaire Michallon, Virology department, Grenoble, France, **5** Centre Hospitalo-Universitaire de Nancy, Médecine infantile II, Nancy, France, **6** Hôpital Jean Verdier, AP-HP, service de Pédiatrie, Bondy, France, **7** Centre Hospitalo-Universitaire de Nantes, Pédiatrie, Nantes, France, **8** UMR542 Inserm-Université Paris Sud, Hôpital Paul Brousse, Villejuif, France, **9** Hôpital d'Enfants Armand Trousseau, Pediatric Hematology unit, Centre de référence de l'histiocytose AP-HP, Paris, France

## Abstract

**Background:** Langerhans cell histiocytosis (LCH) is a rare disease that affects mainly young children, and which features granulomas containing Langerhans-type dendritic cells. The role of several human herpesviruses (HHV) in the pathogenesis of LCH was suggested by numerous reports but remains debated. Epstein-barr virus (EBV, HHV-4), & Cytomegalovirus (CMV, HHV-5) can infect Langerhans cells, and EBV, CMV and HHV-6 have been proposed to be associated with LCH based on the detection of these viruses in clinical samples.

**Methodology:** We have investigated the prevalence of EBV, CMV and HHV-6 infection, the characters of antibody response and the plasma viral load in a cohort of 83 patients and 236 age-matched controls, and the presence and cellular localization of the viruses in LCH tissue samples from 19 patients.

**Principal Findings:** The results show that prevalence, serological titers, and viral load for EBV, CMV and HHV-6 did not differ between patients and controls. EBV was found by PCR in tumoral sample from 3/19 patients, however, EBV small RNAs EBERs –when positive–, were detected by in situ double staining in bystander B CD20<sup>+</sup> CD79a<sup>+</sup> lymphocytes and not in CD1a<sup>+</sup> LC. HHV-6 genome was detected in the biopsies of 5/19 patients with low copy number and viral Ag could not be detected in biopsies. CMV was not detected by PCR in this series.

**Conclusions/Significance:** Therefore, our findings do not support the hypothesis of a role of EBV, CMV, or HHV-6 in the pathogenesis of LCH, and indicate that the frequent detection of Epstein-barr virus (EBV) in Langerhans cell histiocytosis is accounted for by the infection of bystander B lymphocytes in LCH granuloma. The latter observation can be attributed to the immunosuppressive micro environment found in LCH granuloma.

**Citation:** Jeziorski E, Senechal B, Molina TJ, Devez F, Leruez-Ville M, et al. (2008) Herpes-Virus Infection in Patients with Langerhans Cell Histiocytosis: A Case-Controlled Sero-Epidemiological Study, and In Situ Analysis. PLoS ONE 3(9): e3262. doi:10.1371/journal.pone.0003262

**Editor:** Maria G. Masucci, Karolinska Institutet, Sweden

**Received:** June 12, 2008; **Accepted:** August 16, 2008; **Published:** September 23, 2008

**Copyright:** © 2008 Jeziorski et al. This is an open-access article distributed under the terms of the Creative Commons Attribution License, which permits unrestricted use, distribution, and reproduction in any medium, provided the original author and source are credited.

**Funding:** EJ was supported by the Fondation pour la Recherche Médicale (FRM). BS was the recipient of a PhD fellowship from INSERM. Work was supported by a grant from the Agence Nationale de la Recherche (EPI LCH 2005) to JD, IJ and FG, by grants from the FRM, the City of Paris, and an European Young Investigator (EURYI) award to FG. Sponsors or funders did not have any role in the design and conduct of the study, collection, analysis, and interpretation of the data, and in the preparation, review, or approval of the manuscript.

**Competing Interests:** The authors have declared that no competing interests exist.

\* E-mail: geissmann@kcl.ac.uk

These authors contributed equally to this work.

## Introduction

Langerhans cell histiocytosis (LCH, a.k.a. histiocytosis X), is a rare disease that affects mainly young children, and features granulomas consisting of Langerhans-like cells (LC), mixed with macrophages, eosinophiles, multinucleated giant cells, and lymphocytes, that can be found within various tissues [1,2].

The presence of LC in granuloma is a key diagnostic feature of LCH. LC are members of the dendritic cell (DC) family, that

trigger and shape immune responses, and the pathophysiology of LCH is likely to involve immune mechanisms (reviewed in [3,4]). We have previously reported that LC found in LCH granuloma were phenotypically and functionally immature/semi-mature LC [5]. Immature/semi-mature DCs are believed to be prone to induce regulatory T cells, that inhibit polyclonal T cell responses and promote tolerance [6,7,8,9]. The accumulation of immature LC in LCH granulomas was associated with the expansion of FoxP3<sup>+</sup> CD25<sup>+</sup> CD4<sup>+</sup> regulatory T cells both in granuloma and

in the blood of patients [10]. Therefore local and general immunosuppression, which favors reactivation of herpes-virus infection, may be a feature of LCH.

Environmental agents and viruses, in particular Epstein-Barr virus (EBV), or vaccination, have been proposed to trigger, or to play a role in the pathogenesis of the disease [11,12]. Herpesviruses are DNA viruses responsible for persistent infection. EBV is the etiological agent of several malignancies [13,14], and EBV & Cytomegalovirus (CMV) are responsible for hemophagocytic syndromes in human with several inherited immunodeficiencies [15,16]. EBV has been reported to infect monocytes and Langerhans cells (LC), during the natural course of infection in human [17,18]. Infection with EBV has been reported to be associated with LCH, to represent a possible etiology, and/or to contribute to its pathophysiology in some studies [11,12,19]. However, other studies failed to replicate these findings, and the possible causative role of EBV in LCH is debated [20,21,22]. CMV can also infect DC and LC [23,24,25], and one single study reported CMV detection in lesional LC in one third of 29 patients by immunohistochemistry, in situ hybridization, and PCR [26]. HHV-6 infects mainly T cells, but is also reported to infect myeloid cells [27,28] and HHV-6 DNA or immunoreactivity was detected in lesions of 50% to 75% of patient with LCH [29,30], however, control studies performed by the same group concluded that the prevalence of HHV-6 in the tissue of LCH patients is the same as that found in tissue from individuals without disease [31].

Sero-epidemiological studies have been useful to demonstrate the role of EBV in Burkitt lymphoma and Hodgkin disease, when high antibody titers to EBV structural antigens (VCA) have been associated to the risk of developing Burkitt's lymphoma and Hodgkin diseases [32,33]. However, to our knowledge no sero-epidemiological study have been conducted in LCH. The present study was therefore designed to investigate the role of EBV, CMV, and HHV-6 using two methods. First, we performed a case-controlled sero-epidemiological study to investigate a relationship between the onset of LCH in young children and the antibody response to infection with EBV, CMV, or HHV-6, and second we searched for the presence of viruses in the serum of patients, and in Langerhans cells in tumor samples, by PCR and, when positive, we investigated the cellular target of the viruses by immunolabeling and in situ hybridization. Results ruled out an epidemiological association between these herpes-virus and LCH.

## Results

Prevalence of EBV, CMV, and HHV-6 infection as a function of age and of clinical presentation of disease. The presence of antibodies against EBV, CMV and HHV-6 was investigated by ELISA in the serum of 78 children diagnosed with LCH and 206 age matched controls. To avoid contamination by maternal IgG, only children six month-old and older were studied for the presence of specific antibodies in serum. Twenty six children with LCH (33.3%) and 94 controls (47.1%) tested seropositive for EBV. No significant difference was observed between patient and control groups when matched for age (Table 1). Similarly, no significant difference was observed with the control group when patients were grouped by disease stage/clinical presentation (Table 2). Similar results were observed for CMV and HHV-6, and the prevalence of both infections in children with LCH were comparable to their prevalence among age-matched controls (Tables 2, and 3).

Serum IgG titers directed against EBV, as well as CMV and HHV-6, did not differ between patients and controls. Titers of EBV antibodies have been shown to differ from controls in several

**Table 1.** Prevalence of EBV, CMV, and HHV-6 infection in LCH patients

|                     |   | Controls | LCH total | LCH1 | LCH2 | LCH3 |
|---------------------|---|----------|-----------|------|------|------|
| <b>EBV</b>          |   |          |           |      |      |      |
| Non-infected        | n | 109      | 52        | 28   | 12   | 12   |
|                     | % | 52.9     | 66.7      | 65.1 | 63.2 | 75   |
| Infected            | n | 97       | 26        | 15   | 7    | 4    |
|                     | % | 41.1     | 33.3      | 34.9 | 36.8 | 25   |
| Total               | n | 206      | 78        | 43   | 19   | 16   |
|                     | % | 100      | 100       | 100  | 100  | 100  |
| Test Fisher's exact |   | 0.475    |           |      |      |      |
| <b>CMV</b>          |   |          |           |      |      |      |
| Non-infected        | n | 131      | 58        | 32   | 13   | 13   |
|                     | % | 64.2     | 75.3      | 76.2 | 68.4 | 81.2 |
| Infected            | n | 72       | 18        | 9    | 6    | 3    |
|                     | % | 35.3     | 23.4      | 21.4 | 31.6 | 18.8 |
| Unknown*            | n | 1        | 1         | 1    | 0    | 0    |
|                     | % | 0.5      | 1.3       | 2.4  | 0    | 0    |
| Total               | n | 204      | 77        | 42   | 19   | 16   |
|                     | % | 100      | 100       | 100  | 100  | 100  |
| Test Fisher's exact |   | 0.282    |           |      |      |      |
| <b>HHV-6</b>        |   |          |           |      |      |      |
| Non-infected        | n | 33       | 15        | 5    | 5    | 5    |
|                     | % | 1.4      | 19.5      | 11.9 | 26.3 | 31.2 |
| Infected            | n | 161      | 62        | 37   | 14   | 11   |
|                     | % | 80.1     | 80.5      | 88.1 | 7.7  | 68.7 |
| Unknown*            | n | 7        | 0         | 0    | 0    | 0    |
|                     | % | 3.5      | 0         | 0    | 0    | 0    |
| Total               | n | 201      | 77        | 42   | 19   | 16   |
|                     | % | 100      | 100       | 100  | 100  | 100  |
| Test Fisher's exact |   | 0.424    |           |      |      |      |

Unknown\*: IgG value are in the 'grey zone' (see methods)

LCH1: single system, no risk organs

LCH2: multisystem, no risk organs

LCH3: risk organs

doi:10.1371/journal.pone.0003262.t001

diseases linked to EBV [14,34]. IgG VCA titers, and in some cases anti-Epstein-Barr nuclear antigen (EBNA)1 antibody, are consistently higher in patients with nasopharynx carcinoma or Hodgkin disease than in control populations [14]. Lower EBNA1-IgG antibody titer is also considered as a possible serological sign for a defective control of the persistent latent EBV carrier state. In the present study, both VCA IgG and EBNA IgG titers were found to be similar in patients with LCH in comparison with controls, when matched for age, or when grouped by disease stage/clinical presentation (Figure 1A–E). Anti HHV-6 or anti CMV IgG titers were also not different between patients and the control group (data not shown)

Prevalence of detectable serum viral load for EBV, CMV, and HHV-6. Defective control of infection by Herpesviruses such as EBV, CMV and HHV-6 ultimately results in replicative infection and viremia [35]. Serum viral load during CMV infection is a sensitive technique, but in the present study, out of 83 patients and 236 age-matched controls, 0% of patient and 3% of controls (n = 7) had detectable CMV serum viral load (table 4) indicating

**Table 2.** Prevalence of EBV, CMV, and HHV-6 infection as a function of age

|                     | Age 0.5 to 5 |      | Age 5 to 10 |      | Age 10 to 20 |       |
|---------------------|--------------|------|-------------|------|--------------|-------|
|                     | Controls     | LCH  | Controls    | LCH  | Controls     | LCH   |
| <b>EBV</b>          |              |      |             |      |              |       |
| Non-infected        | n            | 79   | 35          | 19   | 11           | 6     |
|                     | %            | 71.8 | 85.4        | 35.8 | 45.8         | 25.6  |
| Infected            | n            | 31   | 6           | 34   | 13           | 32    |
|                     | %            | 28.2 | 14.6        | 64.1 | 54.2         | 74.4  |
| Total               | n            | 110  | 41          | 53   | 24           | 43    |
|                     | %            | 100  | 100         | 100  | 100          | 100   |
| Test Fisher's exact |              |      | 0.093       |      | 0.577        | 0.378 |
| <b>CMV</b>          |              |      |             |      |              |       |
| Non-infected        | n            | 74   | 34          | 29   | 13           | 27    |
|                     | %            | 69.4 | 85          | 54.7 | 54.2         | 62.8  |
| Infected            | n            | 33   | 6           | 23   | 10           | 16    |
|                     | %            | 30.6 | 15          | 43.4 | 41.7         | 37.2  |
| Unknown*            | n            | 0    | 0           | 1    | 1            | 0     |
|                     | %            | 0    | 0           | 1.9  | 4.2          | 0     |
| Total               | n            | 107  | 40          | 53   | 24           | 43    |
|                     | %            | 100  | 100         | 100  | 100          | 100   |
| Test Fisher's exact |              |      | 0.062       |      | 0.82         | 0.186 |
| <b>HHV-6</b>        |              |      |             |      |              |       |
| Non-infected        | n            | 18   | 14          | 5    | 0            | 10    |
|                     | %            | 17   | 35          | 9.4  | 0            | 23.8  |
| Infected            | n            | 84   | 26          | 47   | 24           | 30    |
|                     | %            | 79.2 | 65          | 88.7 | 100          | 71.4  |
| Unknown*            | n            | 4    | 0           | 1    | 0            | 2     |
|                     | %            | 3.8  | 0           | 1.9  | 0            | 4.8   |
| Total               | n            | 106  | 40          | 53   | 24           | 42    |
|                     | %            | 100  | 100         | 100  | 100          | 100   |
| Test Fisher's exact |              |      | 0.037       |      | 0.217        | 0.356 |

doi:10.1371/journal.pone.0003262.t002

the very low incidence of active infection. Serum viral load during EBV infection is considered to be less sensitive than during CMV infection [36], nevertheless we found that only 1.2% of patients

(n = 1) and a similar percentage (0.9% of controls, n = 2) had a detectable EBV viral load in serum (Table 4). These results are consistent with anti-VCA IgG titers, which were found similar in

**Table 3.** Prevalence of HHV-6 infection in children before the age of 5 years

|                     | Age 0.5 to 1 |      | Age 1 to 1.5 |      | Age 1.5 to 2 |      | Age 2 to 5 |      |       |
|---------------------|--------------|------|--------------|------|--------------|------|------------|------|-------|
|                     | controls     | LCH  | controls     | LCH  | controls     | LCH  | controls   | LCH  |       |
| Non-infected        | n            | 5    | 8            | 0    | 2            | 4    | 0          | 9    | 4     |
|                     | %            | 35.7 | 66.7         | 0    | 33.3         | 30.8 | 0          | 14.8 | 21    |
| Infected            | n            | 9    | 4            | 17   | 4            | 9    | 3          | 49   | 15    |
|                     | %            | 64.3 | 33.3         | 95.4 | 66.7         | 69.2 | 100        | 80.3 | 79    |
| Unknown*            | n            | 0    | 0            | 1    | 0            | 0    | 0          | 3    | 0     |
|                     | %            | 0    | 0            | 5.6  | 0            | 0    | 0          | 4.9  | 0     |
| Total               | n            | 14   | 12           | 18   | 6            | 13   | 3          | 61   | 19    |
|                     | %            | 100  | 100          | 100  | 100          | 100  | 100        | 100  | 100   |
| Test Fisher's exact |              |      | 0.238        |      | 0.054        |      | 0.529      |      | 0.663 |

doi:10.1371/journal.pone.0003262.t003

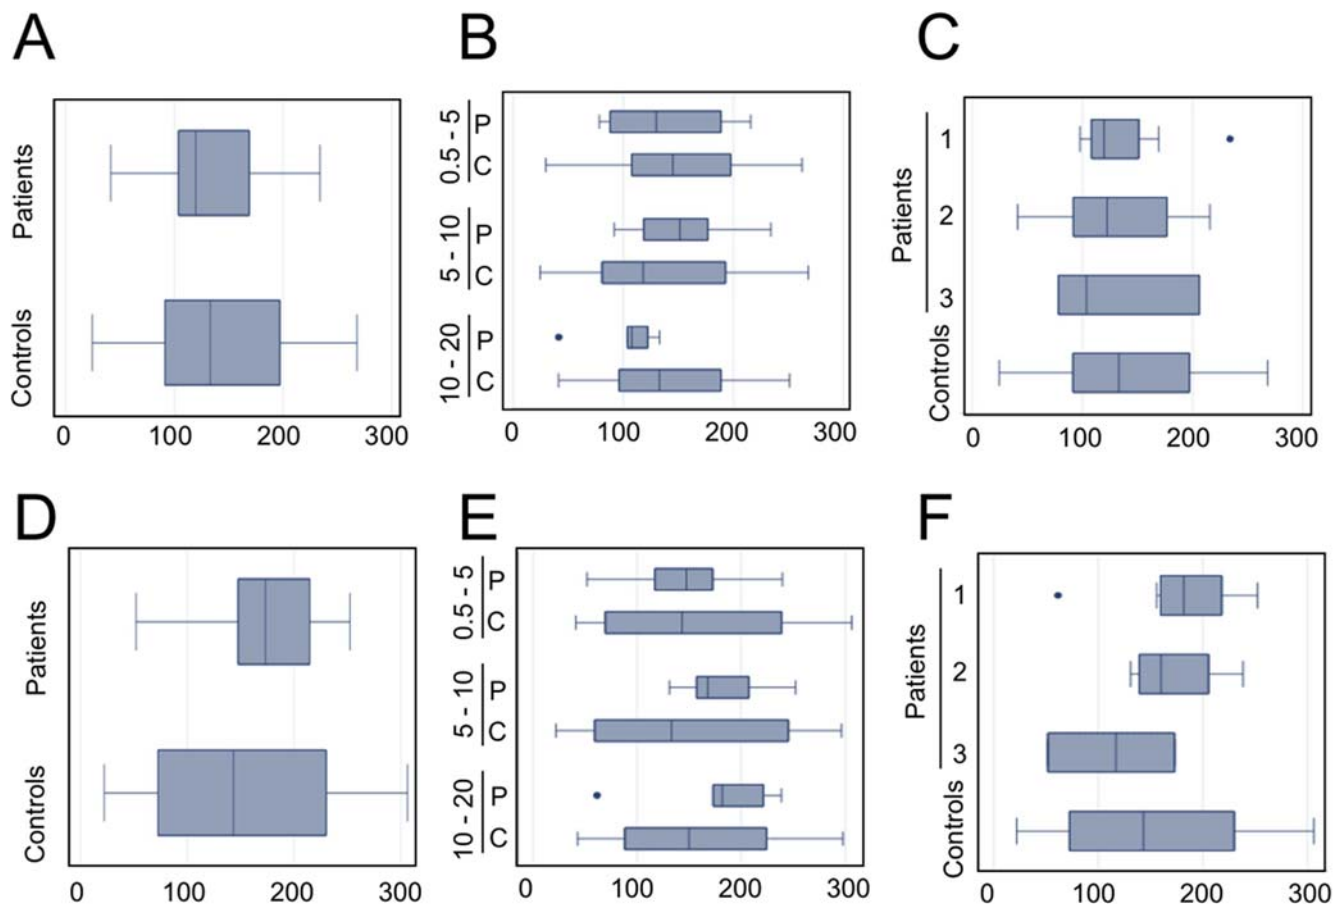

**Figure 1. VCA-IgG and EBNA-IgG titers (UA/ml) in patients and controls with past EBV infection.** VCA-IgG (A, B, C) and EBNA-IgG titers (D, E, F) (UA/ml) were determined as indicated in methods, and patients were compared to controls without stratification (A, D), and after stratification based on age (B, E), or disease extension (C, F).  
doi:10.1371/journal.pone.0003262.g001

patients and controls (see figure 1), since EBV viral load was shown to be correlated with anti-VCA IgG titer [34]. The significance of the detection of HHV-6 in the serum is still discussed [37,38], but again only 3.6% of patients ( $n = 3$ ) and 2.5% of controls ( $n = 6$ ) had a detectable HHV-6 serum viral load, and there was no difference between groups as per fisher exact's test (Table 4).

Detection of EBV, CMV, and HHV-6 DNA in biopsy samples from LCH granuloma. We then investigated whether Herpesviruses were present in LCH granuloma, in the absence of overt viremia. As shown in table 5, EBV DNA was found in 15% of biopsy samples examined (3/19 patients, #1, 9, & 15), and HHV-6 DNA in 26% of biopsy samples examined (5/19 patients). CMV DNA was not detected in this series. EBV and HHV-6 viral loads were low with a median of 400 copies/ $10^6$  cells except for patient #5. Patient #5 display a very high HHV-6 load in the biopsy and in the blood over time (data not shown) compatible with the detection of a chromosomally integrated HHV-6 DNA [39].

Therefore, our data support previous results showing the presence of EBV or HHV-6 in a subset of LCH granuloma. However, since HHV-6 and EBV are responsible for persistent infection of T cells and B cells respectively, the detection of virus DNA in LCH samples could be attributed to infection of bystander cells [21].

We therefore investigated whether EBV infects bystanders lymphocytes, macrophages, and Langerhans cells in samples from patients #1, 9, & 15, which tested positive by PCR, using in situ

hybridisation with a probe against EBV EBERs RNA on paraffin sections of LCH granuloma, followed by immunohistochemistry with antibodies against B-cells (CD20 & CD79a), T-cells (CD3), macrophages (CD68), or Langerhans cell (CD1a) antigens on the same tissue sections. EBV positive cells were always found in areas rich in B cells, and were labeled with either CD20, or CD79a antibodies (Figure 2), while no EBER+ cell labelled with CD1a, CD3, or CD68 cell was observed. These data indicate that EBV infects bystander B cells, which are present in a subsets of LCH granuloma [12]. Although positive controls were obtained, we did not observed immunoreactivity against HHV-6 in samples positive for HHV-6 DNA by PCR (data not shown), therefore the cellular target of HHV6 in LCH granuloma was not identified.

## Discussion

The present study is the largest case-controlled sero-epidemiological study performed in this disease. The results argue against an epidemiological association between LCH and EBV, CMV, or HHV-6 infection.

Further investigation of the cellular localization of the viruses in LCH tissue samples from 19 patients indicated that, when present, EBV infected bystander lymphocytes and not Langerhans cells. We think that our results therefore resolve the much debated issue of the role of EBV in the pathogenesis of LCH [19,21,22,30,31]. Because EBV infected B cells are present in the blood of healthy

**Table 4.** Prevalence of detectable serum viral load for EBV, CMV, and HHV-6

|                                | Patients | Controls | Total |
|--------------------------------|----------|----------|-------|
| <b>EBV</b>                     |          |          |       |
| Negative                       | 82       | 234      | 316   |
| %                              | 98.8     | 99.1     | 99.1  |
| Positive                       | 1        | 2        | 3     |
| %                              | 1.2      | 0.9      | 0.9   |
| Total                          | 83       | 236      | 319   |
| %                              | 100      | 100      | 100   |
| Fisher's exact = 1.000         |          |          |       |
| 1-sided Fisher's exact = 0.596 |          |          |       |
| <b>CMV</b>                     |          |          |       |
| Negative                       | 83       | 229      | 312   |
| %                              | 100      | 97.      | 97.8  |
| Positive                       | 0        | 7        | 7     |
| %                              | 0        | 3        | 2.2   |
| Total                          | 83       | 236      | 319   |
| %                              | 100      | 100      | 100   |
| Fisher's exact = 0.197         |          |          |       |
| 1-sided Fisher's exact = 0.118 |          |          |       |
| <b>HHV-6</b>                   |          |          |       |
| Negative                       | 80       | 230      | 310   |
| %                              | 96.4     | 97.5     | 97.2  |
| Positive                       | 3        | 6        | 9     |
| %                              | 3.6      | 2.5      | 2.8   |
| Total                          | 83       | 236      | 319   |
| %                              | 100      | 100      | 100   |
| Fisher's exact = 0.701         |          |          |       |
| 1-sided Fisher's exact = 0.428 |          |          |       |

doi:10.1371/journal.pone.0003262.t004

seropositive individuals [40] at a low frequency in the order of  $10^{-6}$  [41] it is not unexpected to find a small number of EBV infected B cells in LCH granuloma, which contains B cells. In addition, because the growth of EBV infected B cells is under the control of CD8 cytotoxic T cells in healthy individuals [42], the regulatory T cell-rich environment of the LCH granuloma [10], may represent a sanctuary for such EBV infected B cells.

Anti CMV IgG titers in patients and controls, and absence of detection of the virus by PCR in the serum and in biopsy samples strongly suggest that CMV is not associated with LCH.

The case of HHV6 is more complicated. HHV-6 was detected by PCR in the serum of 3.8% of patients and 2.5% of controls with viral loads above  $10^4$  copies/ml in 5 out of 9 detected (data not shown). The prevalence of HHV-6 in patients and controls were similar to the reported prevalence of chromosomally integrated HHV6 among blood donors [39]. Therefore HHV6 detection may be related to the presence of chromosomally integrated HHV-6. HHV6 DNA was also detected by PCR in biopsies from 5/19 patients (26%), suggesting that HHV6, like EBV can be found in LCH granuloma. However the viral load was very low, and the virus was not detectable by immunochemistry suggesting that HHV-6 infection is quiescent. Together with our serological data and serum PCR, and in the light of the study of Glotzbecker et al, [31] who found a similar frequency PCR positive samples in

**Table 5.** Detection of EBV, CMV, and HHV-6 DNA in biopsy samples from LCH granuloma.

| Patient | stage | sex | HHV-6           | EBV               | CMV |
|---------|-------|-----|-----------------|-------------------|-----|
| 1       | LCH1  | F   | -               | $6 \times 10^3$   | -   |
| 2       | LCH1  | M   | $8 \times 10^2$ | -                 | -   |
| 3       | LCH1  | M   | -               | -                 | -   |
| 4       | LCH1  | F   | $6 \times 10^1$ | -                 | -   |
| 5       | LCH1  | M   | $2 \times 10^6$ | -                 | -   |
| 6       | LCH1  | F   | -               | -                 | -   |
| 7       | LCH1  | M   | -               | -                 | -   |
| 8       | LCH1  | F   | -               | -                 | -   |
| 9       | LCH1  | F   | -               | $1.7 \times 10^5$ | -   |
| 10      | LCH1  | F   | -               | -                 | -   |
| 11      | LCH1  | M   | -               | -                 | -   |
| 12      | LCH1  | M   | -               | -                 | -   |
| 13      | LCH1  | M   | -               | -                 | -   |
| 14      | LCH1  | F   | -               | -                 | -   |
| 15      | LCH1  | M   | -               | $4 \times 10^2$   | -   |
| 16      | LCH2  | M   | $4 \times 10^2$ | -                 | -   |
| 17      | LCH3  | M   | -               | -                 | -   |
| 18      | LCH3  | M   | -               | -                 | -   |
| 19      | LCH3  | M   | $4 \times 10^2$ | -                 | -   |

Positive results are expressed as the number of viral genome copies per million cells.

doi:10.1371/journal.pone.0003262.t005

LCH granuloma and control tissues, we hypothesize that HHV6 do not productively infect LC in vivo and may be carried by bystander lymphocytes which are present in the granuloma.

Our study did not identify a subset of patients with 'herpesviruses associated' LCH. We did not find an association between EBV, CMV, or HHV-6 infection and patients when they were stratified by age, or by clinical stage.

Among other herpes viruses, HHV-1 (HSV-1), HHV-2 (HSV-2), HHV-3 (VZV) and HHV-7 infections were never reported to be associated with LCH, and were not investigated in this study. Among herpesviruses, HHV-8 has been initially reported to infect dendritic cells, but several studies have excluded its association with LCH [43,44].

## Methods

### Patients & controls

The diagnostic and inclusion criteria as well as the definition of the organs involvement for the French nationwide LCH survey have been described elsewhere [2]. Briefly, the extension of the diseases has been classified in three groups according to histiocyte society criteria: group 1: single organ extension, without risk organs group 2 multsystem organ without risk organs and group 3 patients with risk organs i.e. lung and/or liver and/or spleen and/or hematological dysfunction. According to French bioethics laws, informed consent was signed if the patients participated and the database was approved by the French computer watchdog commission (CNIL certificate n° 99.087). Clinical information, radiological findings and extension were recorded, together with treatments received. Data monitoring, based on medical charts, was done by a clinical research associate who visited each center. Involvement of at least one new organ, as described elsewhere 2,

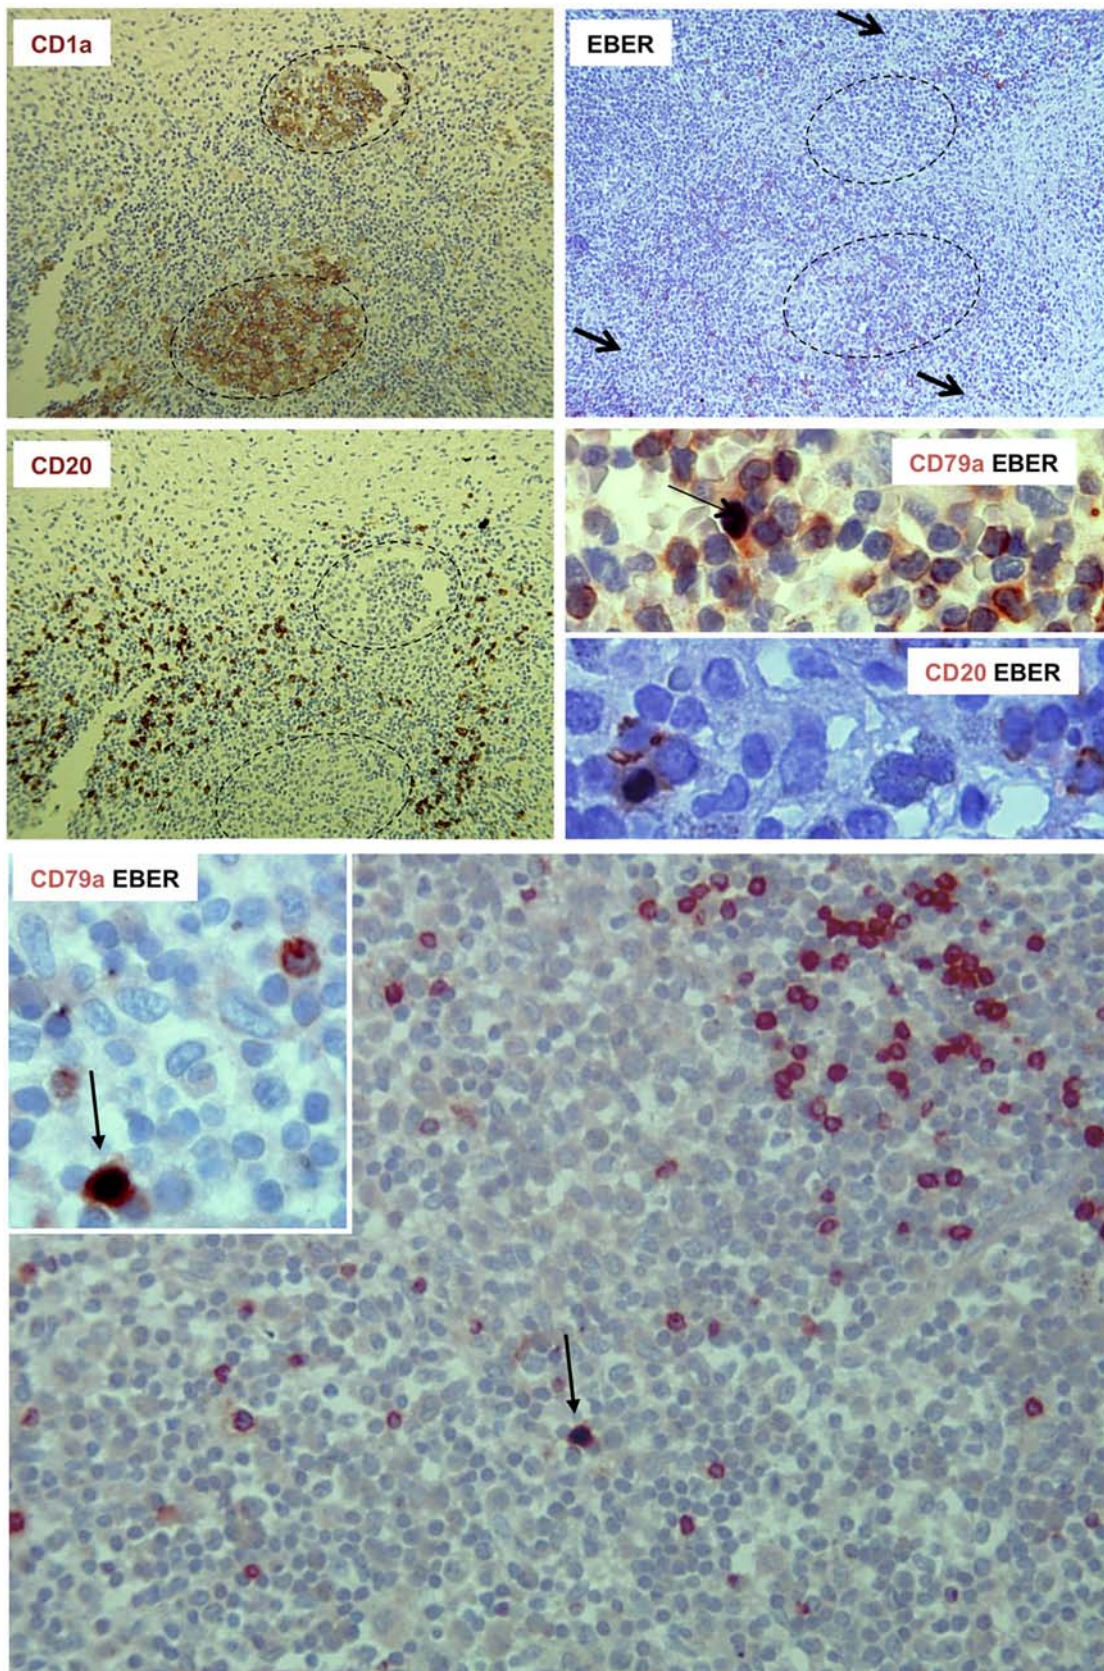

**Figure 2. Detection of EBV-infected B cells by in situ hybridization combined with immunohistochemistry.** Granuloma serial sections were stained for CD1a (upper left) or for CD20 (middle left) by immunohistochemistry or for EBERs by in situ hybridisation (upper right, arrows indicate EBER positive cells). Combined detection of CD20 or CD79a with EBERs shows that EBV-infected cells are B cells (arrows).  
doi:10.1371/journal.pone.0003262.g002

was considered to define an LCH episode. Serum specimens were obtained, after written witnessed informed consent was obtained from the parents of all patients, from 83 pediatric patients with LCH included in the French LCH registry, following a research protocol approved by the ethics committee of the Nantes University Hospital (France, EU). Biopsies samples were also obtained from 19 patients with LCH included in the French LCH registry after written witnessed informed consent was obtained. Control serum samples were obtained from the children admitted to the outpatient unit of the Grenoble University Hospital (France, EU), according to institutional guidelines, and were matched for age with patient samples for statistical analysis.

## Serology

Qualitative and quantitative analysis of specific Ig against EBV, CMV and HHV-6 were performed on serum samples from 83 patients and 235 controls using microplate ELISA kits: IgG anti-VCA (ETI-VCA-G, DiaSorin®), IgG anti-EBNA (ETI-EBNA-G, DiaSorin®), IgM anti-VCA (DiaSorin®, ETI-EBV-M), IgG anti-CMV (ETI-CYTOK-G PLUS, DiaSorin®) and IgG anti-HHV-6 (HHV-6 IgG EIA, Biotrin®). Patients and controls were classified in three categories according to the detection of specific IgG i/ above the upper limit of the grey zone for “infected” status, ii/ in the grey zone for “unknown” status, iii/ below the lower limit of the grey zone for “uninfected” status.

## DNA extraction from frozen biopsies and serum

DNA was extracted from sliced frozen biopsies using ALLPrep DNA/RNA minikit (Qiagen, Hilden, Germany). Total DNA was eluted with 200 µl of water and amplification of the beta-globin gene by real time PCR was used to evaluate total cell number per sample (Beta-globin PCR Kit, Roche Diagnostics®). DNA was extracted from 200 µl of serum using Blood DNA mini kit and eluted in a volume of 100 µl.

## Quantitative PCR for the detection of EBV, CMV and HHV-6

ten µl of DNA extract were used to detect and quantify viral genomes by real time PCR assays. All positive PCR were run a second time for confirmation.

EBV tyrosine kinase gene (TK) was amplified from biopsies DNA with T1 (5'-GGGGCAAATACTGTGTTAG-3')+T2 (5'-CGGGGACACCATAGT-3') primers and LC1 (5'-ATGTTTCCTCCCTCGCTTCTTCAG-fluo-3')+LC2 (5'-ATGTTTCCTCCCTCGCTTCTTCAG-fluo-3') probes. PCR were run on a Light Cycler. The EBV-negative DG75 cell line was used as a negative control. The EBV-positive Burkitt's lymphoma cell line “Namalwa” [45] harboring 2 copies of viral genome per cell is used as a standard for quantification. Detection limit is 2 copies of viral genome per amplification [46].

## References

- Lichtenstein L (1953) Histiocytosis X; integration of eosinophilic granuloma of bone, Letterer-Siwe disease, and Schuller-Christian disease as related manifestations of a single nosologic entity. *AMA Arch Pathol* 56: 84–102.
- French Histiocytosis study group (1996) A multicentre retrospective survey of Langerhans' cell histiocytosis: 348 cases observed between 1983 and 1993. The French Langerhans' Cell Histiocytosis Study Group. *Arch Dis Child* 75: 17–24.
- Ladisch S (1998) Langerhans cell histiocytosis. *Curr Opin Hematol* 5: 54–58.
- Laman JD, Leenen PJ, Annels NE, Hogendoorn PC, Egeler RM (2003) Langerhans-cell histiocytosis 'insight into DC biology'. *Trends Immunol* 24: 190–196.
- Geissmann F, Lepelletier Y, Fraïtag S, Valladeau J, Bodemer C, et al. (2001) Differentiation of Langerhans cells in Langerhans cell histiocytosis. *Blood* 97: 1241–1248.
- Roncarolo MG, Levings MK, Traversari C (2001) Differentiation of T regulatory cells by immature dendritic cells. *J Exp Med* 193: F5–9.
- Mahnke K, Knop J, Enk AH (2003) Induction of tolerogenic DCs: 'you are what you eat'. *Trends Immunol* 24: 646–651.
- Hawiger D, Inaba K, Dorsett Y, Guo M, Mahnke K, et al. (2001) Dendritic cells induce peripheral T cell unresponsiveness under steady state conditions in vivo. *J Exp Med* 194: 769–779.
- Steinman RM, Nussenzweig MC (2002) Avoiding horror autotoxicus: the importance of dendritic cells in peripheral T cell tolerance. *Proc Natl Acad Sci U S A* 99: 351–358.
- Senéchal B, Elain G, Jeziorski E, Grondin V, Patey-Mariaud de Serre N, et al. (2007) Expansion of regulatory T cells in patients with langerhans cell histiocytosis. *PLoS Med* 4: e253.

CMV immediate early-1 gene (IE1) was amplified using forward 5'-GCAGACTCTCAGAGGAT-3'+reverse 5'-AGCGCCG-CATTGAGGA-3' primers and a 6-carboxyfluorescein (FAM) - 5' ATCTGCATGAAGTCTTTGCCAGTACATT-3' carboxytetramethyl rhodamine (TAMRA) probe. PCR were run on a ABI 7300 real time PCR system (Applied Biosystem). Quantification was obtained using a plasmid and the detection limit is 20 copies of viral genome per amplification [35].

HHV-6 U65-U66 gene was amplified using forward 5'-GACAATCACATGCCTGGATAATG-3'+reverse 5'-TGTAAG-CGTGTGGTAATGGACTAA -3' primers and a 6-carboxyfluorescein (FAM) -5' AGCAGCTGGCGAAAAGTGCTGTGC-3' carboxytetramethyl rhodamine (TAMRA) probe. PCR were run on a ABI 7300 real time PCR system (Applied Biosystem). Quantification was obtained using a plasmid and detection limit is 25 copies of viral genome per amplification [47].

PCR results were expressed as the number of viral genome copies per million cells for biopsies and as the number of viral genome copies per ml of serum from peripheral blood.

## In situ hybridization & immunohistochemistry

Detection of EBV EBERS RNA by in situ hybridization was performed first and was followed by immunohistochemistry with antibodies against B-cell, T-cell and Langerhans cell antigens. Five micrometers paraffin-embedded sections were mounted onto glass slides and pretreated in 0.4% pepsine HCl 0.2M, then hybridized with EBV PNA probes (DAKO), following the manufacturer's instructions, and revealed with NBT/BCIP after APAAP amplification. Immunohistochemistry was then performed using a streptavidin-biotin peroxidase method (LSAB2, DAKO) after microwave heating, revealed with AEC or DAB. Antibodies used were directed against the following antigens : CD20 (L26, 1:200, Dako), CD79a (JCB117, 1:50, Dako), CD3 (UCHT1, 1:50 Dako), CD1a (MTB1, 1:25, Novocastra), CD68 (KP1, 1:200, Dako).

## Statistical methods

Stata Software® version 8 was used for all statistical analyses. Categorical data were compared by using Fisher's exact test, and quantitative data (titer if seropositivity) by using Kruskal-Wallis non parametric test. All tests were two-tailed. P values of less than 0.05 were considered to indicate statistical significance unless otherwise stated.

## Author Contributions

Conceived and designed the experiments: BS TM JD FG. Performed the experiments: EJ BS FD MLV. Analyzed the data: EJ BS TM MLV IJ JD FG. Contributed reagents/materials/analysis tools: TM PM CG LM JG MD FJ JMS CT IJ. Wrote the paper: BS JD FG.

11. Chen CJ, Ho TY, Lu JJ, Sheu LF, Lee SY, et al. (2004) Identical twin brothers concordant for Langerhans' cell histiocytosis and discordant for Epstein-Barr virus-associated haemophagocytic syndrome. *Eur J Pediatr* 163: 536–539.
12. Sakata N, Toguchi N, Kimura M, Nakayama M, Kawa K, et al. (2007) Development of Langerhans cell histiocytosis associated with chronic active Epstein-Barr virus infection. *Pediatr Blood Cancer*.
13. Purtilo DT (1980) Epstein-Barr-virus-induced oncogenesis in immune-deficient individuals. *Lancet* 1: 300–303.
14. Young LS, Rickinson AB (2004) Epstein-Barr virus: 40 years on. *Nat Rev Cancer* 4: 757–768.
15. Menasche G, Feldmann J, Fischer A, de Saint Basile G (2005) Primary hemophagocytic syndromes point to a direct link between lymphocyte cytotoxicity and homeostasis. *Immunol Rev* 203: 165–179.
16. Rigaud S, Fondaneche MC, Lambert N, Pasquier B, Mateo V, et al. (2006) XIAP deficiency in humans causes an X-linked lymphoproliferative syndrome. *Nature* 444: 110–114.
17. Tugizov S, Herrera R, Veluppillai P, Greenspan J, Greenspan D, et al. (2007) Epstein-Barr virus (EBV)-infected monocytes facilitate dissemination of EBV within the oral mucosal epithelium. *J Virol* 81: 5484–5496.
18. Walling DM, Ray AJ, Nichols JE, Flaitz CM, Nichols CM (2007) Epstein-Barr virus infection of Langerhans cell precursors as a mechanism of oral epithelial entry, persistence, and reactivation. *J Virol* 81: 7249–7268.
19. Shimakage M, Sasagawa T, Kimura M, Shimakage T, Seto S, et al. (2004) Expression of Epstein-Barr virus in Langerhans' cell histiocytosis. *Hum Pathol* 35: 862–868.
20. McClain K, Jin H, Gresik V, Favara B (1994) Langerhans cell histiocytosis: lack of a viral etiology. *Am J Hematol* 47: 16–20.
21. Schenka AA, De Angelo Andrade LA, Amstalden EM, Cintra ML, Vassallo J, et al. (2006) Langerhans cell histiocytosis and its relationship with Epstein-Barr virus. *Hum Pathol* 37: 1508–1509; author reply 1509–1511.
22. Brousset P (2004) Epstein-Barr virus and Langerhans cell histiocytosis. *Hum Pathol* 35: 1573–1574; author reply 1574.
23. Hertel L, Lacaille VG, Strobl H, Mellins ED, Mocarski ES (2003) Susceptibility of immature and mature Langerhans cell-type dendritic cells to infection and immunomodulation by human cytomegalovirus. *J Virol* 77: 7563–7574.
24. Lee AW, Hertel L, Louie RK, Burster T, Lacaille V, et al. (2006) Human cytomegalovirus alters localization of MHC class II and dendrite morphology in mature Langerhans cells. *J Immunol* 177: 3960–3971.
25. Senechal B, Boruchov AM, Reagan JL, Hart DN, Young JW (2004) Infection of mature monocyte-derived dendritic cells with human cytomegalovirus inhibits stimulation of T-cell proliferation via the release of soluble CD83. *Blood* 103: 4207–4215.
26. Kawakubo Y, Kishimoto H, Sato Y, Yanagimoto K, Tsuruta T, et al. (1999) Human cytomegalovirus infection in foci of Langerhans cell histiocytosis. *Virchows Arch* 434: 109–115.
27. Kondo K, Kondo T, Okuno T, Takahashi M, Yamanishi K (1991) Latent human herpesvirus 6 infection of human monocytes/macrophages. *J Gen Virol* 72 ( Pt 6): 1401–1408.
28. Kondo K, Kondo T, Shimada K, Amo K, Miyagawa H, et al. (2002) Strong interaction between human herpesvirus 6 and peripheral blood monocytes/macrophages during acute infection. *J Med Virol* 67: 364–369.
29. Leahy MA, Krejci SM, Friednash M, Stockert SS, Wilson H, et al. (1993) Human herpesvirus 6 is present in lesions of Langerhans cell histiocytosis. *J Invest Dermatol* 101: 642–645.
30. Glotzbecker MP, Carpentieri DF, Dormans JP (2004) Langerhans cell histiocytosis: a primary viral infection of bone? Human herpes virus 6 latent protein detected in lymphocytes from tissue of children. *J Pediatr Orthop* 24: 123–129.
31. Glotzbecker MP, Dormans JP, Pawel BR, Wills BP, Joshi Y, et al. (2006) Langerhans cell histiocytosis and human herpes virus 6 (HHV-6), an analysis by real-time polymerase chain reaction. *J Orthop Res* 24: 313–320.
32. de-The G, Geser A, Day NE, Tukei PM, Williams EH, et al. (1978) Epidemiological evidence for causal relationship between Epstein-Barr virus and Burkitt's lymphoma from Ugandan prospective study. *Nature* 274: 756–761.
33. Mueller N, Evans A, Harris NL, Comstock GW, Jellum E, et al. (1989) Hodgkin's disease and Epstein-Barr virus. Altered antibody pattern before diagnosis. *N Engl J Med* 320: 689–695.
34. Besson C, Amiel C, Le-Pendeven C, Brice P, Ferme C, et al. (2006) Positive correlation between Epstein-Barr virus viral load and anti-viral capsid immunoglobulin G titers determined for Hodgkin's lymphoma patients and their relatives. *J Clin Microbiol* 44: 47–50.
35. Leruez-Ville M, Ouachee M, Delarue R, Sauget AS, Blanche S, et al. (2003) Monitoring cytomegalovirus infection in adult and pediatric bone marrow transplant recipients by a real-time PCR assay performed with blood plasma. *J Clin Microbiol* 41: 2040–2046.
36. Balfour HH Jr., Holman CJ, Hokanson KM, Lelonek MM, Giesbrecht JE, et al. (2005) A prospective clinical study of Epstein-Barr virus and host interactions during acute infectious mononucleosis. *J Infect Dis* 192: 1505–1512.
37. Ward KN, Leong HN, Thiruchelvam AD, Atkinson CE, Clark DA (2007) Human herpesvirus 6 DNA levels in cerebrospinal fluid due to primary infection differ from those due to chromosomal viral integration and have implications for diagnosis of encephalitis. *J Clin Microbiol* 45: 1298–1304.
38. Achour A, Boutolleau D, Slim A, Agut H, Gautheret-Dejean A (2007) Human herpesvirus-6 (HHV-6) DNA in plasma reflects the presence of infected blood cells rather than circulating viral particles. *J Clin Virol* 38: 280–285.
39. Leong HN, Tuke PW, Tedder RS, Khanom AB, Eglin RP, et al. (2007) The prevalence of chromosomally integrated human herpesvirus 6 genomes in the blood of UK blood donors. *J Med Virol* 79: 45–51.
40. Lewin N, Aman P, Masucci MG, Klein E, Klein G, et al. (1987) Characterization of EBV-carrying B-cell populations in healthy seropositive individuals with regard to density, release of transforming virus and spontaneous outgrowth. *Int J Cancer* 39: 472–476.
41. Wagner HJ, Bein G, Bitsch A, Kirchner H (1992) Detection and quantification of latently infected B lymphocytes in Epstein-Barr virus-seropositive, healthy individuals by polymerase chain reaction. *J Clin Microbiol* 30: 2826–2829.
42. Khanna R, Burrows SR, Moss DJ (1995) Immune regulation in Epstein-Barr virus-associated diseases. *Microbiol Rev* 59: 387–405.
43. Slacmouder M, Geissmann F, Lepelletier Y, Fournet JC, Brousse N, et al. (2002) No association between Langerhans cell histiocytosis and human herpes virus 8. *Med Pediatr Oncol* 39: 187–189.
44. Jenson HB, McClain KL, Leach CT, Deng JH, Gao SJ (2000) Evaluation of human herpesvirus type 8 infection in childhood langerhans cell histiocytosis. *Am J Hematol* 64: 237–241.
45. Henderson A, Ripley S, Heller M, Kieff E (1983) Chromosome site for Epstein-Barr virus DNA in a Burkitt tumor cell line and in lymphocytes growth-transformed in vitro. *Proc Natl Acad Sci U S A* 80: 1987–1991.
46. Brengel-Pesce K, Morand P, Schmuck A, Bourgeat MJ, et al. (2002) Routine use of real-time quantitative PCR for laboratory diagnosis of Epstein-Barr virus infections. *J Med Virol* 66: 360–9.
47. Gautheret-Dejean A, Manichanh C, Thien-Ah-Koon F, Fillet AM, Mangeny N, et al. (2002) Development of a real-time polymerase chain reaction assay for the diagnosis of human herpesvirus-6 infection and application to bone marrow transplant patients. *J Virol Methods* 100: 27–35.
